# Supplementary material for: Fine-scale mapping of chromosome 9q22.33 identifies candidate causal variant in ovarian cancer
Source: PeerJ. 2024 Feb 14;12:e16918. doi: 10.7717/peerj.16918 (PMC10874173; doi:10.7717/peerj.16918)
Supplement: Supplemental Information 11 [file peerj-12-16918-s011.xlsx]

## Sheet: Sheet1
ID	group	Age	rs1889268	rs7027650
1	case	54	C	AT
2	case	57	C	AT
3	case	63	C	AT
4	case	54	C	T
5	case	57	C	AT
6	case	57	CT	A
7	case	59	C	T
8	case	53	CT	AT
9	case	52	CT	A
10	case	30	C	T
11	case	48	C	AT
12	case	59	C	T
13	case	27	T	A
14	case	55	C	AT
15	case	69	C	T
16	case	51	C	AT
17	case	53	CT	AT
18	case	49	CT
19	case	71	C	T
20	case	58	C	T
21	case	60	C	T
22	control	55	CT	AT
23	control	55	C	T
24	case	62	C	AT
25	case	56	C	AT
26	case	67	C	T
27	case	46	CT	AT
28	case	51		A
29	case	47	C
30	case	53	C	AT
31	case	53	CT	AT
32	case	58	C	T
33	case	56		T
34	case	60	C	T
35	case	63	C	A
36	case	64	T	A
37	case	75	CT	AT
38	case	75	T	A
39	case	64	CT	AT
40	case	49	CT	AT
41	control	60	C	AT
42	control	60	C	AT
43	case	64	C	A
44	case	60	CT	AT
45	case	45	C	AT
46	control	60	C	T
47	control	60	C	T
48	case	53		AT
49	case	64	C	T
50	control	66		T
51	case	82	CT	AT
52	control	60	CT	AT
53	case	63	C	T
54	case	72	CT	T
55	case	63	CT	AT
56	case	52	C	T
57	case	60	C	T
58	case	60	CT	AT
59	case	39	C	T
60	case	39	CT	AT
61	case	67	C	T
62	case	68	CT	AT
63	case	18	CT	AT
64	case	69	CT	T
65	case	70	CT	AT
66	control	60	C	T
67	case	64	C	AT
68	control	60	CT	AT
69	control	60	CT	A
70	control	60	CT	AT
71	control	71	T	T
72	case	44	C	AT
73	case	36	C	T
74	case	72	C	T
75	case	82	C	T
76	case	47	CT	T
77	control	65	C
78	case	53	CT	AT
79	control	60	CT	AT
80	case	54	T	AT
81	control	60	C	AT
82	case	57	C	T
83	control	60	CT	A
84	case	46	C	T
85	case	58	CT	AT
86	control	77	CT	AT
87	control	33	CT	AT
88	case	78	C	T
89	case	79	CT	AT
90	case	58	C	T
91	case	81	CT	T
92	case	82	T	A
93	case	50	CT	T
94	case	42	CT	A
95	case	30	CT	AT
96	case	83	CT	A
97	case	42	C
98	case	51	C	T
99	control	65	T	A
100	control	66	CT	AT
101	case	59		T
102	control	69	CT	T
103	case	85	CT
104	case	47	CT	AT
105	case	56	CT	T
106	case	23	CT	AT
107	case	23	C	T
108	case	52	CT	AT
109	case	45	C	AT
110	case	89	CT	AT
111	case	61	T	AT
112	case	61	C	T
113	case	61	C	T
114	case	40	CT	AT
115	case	71	CT	T
116	case	58	C	T
117	case	50	C	T
118	case	50	T	A
119	case	94	T	AT
120	case	61	CT	AT
121	control	65		T
122	case	54	C	AT
123	case	35	CT	T
124	case	43	C	AT
125	case	49	CT	AT
126	control	65	C	T
127	control	66	CT	AT
128	case	47	CT	AT
129	case	50	C	T
130	case	62	T	AT
131	case	55	C	AT
132	case	56	CT	A
133	control	81		AT
134	case	67		T
135	case	58	CT	AT
136	control	87	C	T
137	control	81	C	T
138	control	86	CT	A
139	case	64	CT	AT
140	case	31	C	AT
141	case	78	C	A
142	case	48	C	T
143	control	86	CT	AT
144	case	69	CT	AT
145	control	91	CT	AT
146	case	49	C	T
147	case	54	C	T
148	control	81	CT	AT
149	case	62	CT	AT
150	case	51	CT	AT
151	control	76	CT	AT
152	case	44	CT	AT
153	control	71	C	T
154	control	95	CT	AT
155	control	71		AT
156	control	76	CT	AT
157	case	43	C	T
158	control	71		AT
159	control	76	CT	AT
160	case	49	C	AT
161	control	55	C	T
162	case	63	C	T
163	control	55	CT	AT
164	case	63	T	A
165	control	76	C	T
166	case	49		AT
167	control	55		T
168	control	74	CT	AT
169	case	48	CT	AT
170	control	74	C	T
171	control	74	C	T
172	case	60	CT	AT
173	control	80	CT	AT
174	case	47	CT	AT
175	control	76	C	AT
176	case	46	C	T
177	case	46	CT	A
178	case	60	CT	A
179	case	18	C	T
180	control	80	CT	AT
181	case	73	CT	AT
182	control	72	C	T
183	case	46	CT	AT
184	case	61	CT	AT
185	case	63	C	T
186	case	47	CT	A
187	case	69	CT	AT
188	control	72	C	T
189	case	48	CT	T
190	control	55	T	A
191	case	53	C	AT
192	case	63	C	T
193	case	37	CT	A
194	case	60	CT	A
195	control	63	CT	AT
196	control	75	C	AT
197	control	65	CT	AT
198	control	56	CT	AT
199	control	80	C	AT
200	control	54		AT
201	control	65	CT	AT
202	control	51	C	A
203	control	48	C	T
204	control	48	C	AT
205	control	81	CT	AT
206	control	61	CT	AT
207	control	51	C	A
208	control	56	C	A
209	control	60	C	T
210	control	48	T	A
211	control	66	CT	AT
212	control	54	CT	AT
213	control	56	C	AT
214	control	76	T	A
215	control	33	C	T
216	control	59	C	T
217	control	65	C	T
218	control	61	CT	AT
219	control	60	C	AT
220	control	61	CT	AT
221	control	64	C	T
222	control	81	C	T
223	control	50	CT	AT
224	control	60	CT	A
225	control	48	C	T
226	control	48	C	T
227	control	47	CT	AT
228	control	68	CT	AT
229	control	52	CT	A
230	control	51	C	T
231	control	36	C	T
232	control	38	C	AT
233	control	58	T	A
234	control	43	T	A
235	control	39	C	A
236	control	48	C	AT
237	control	38	C	T
238	control	50	C	T
239	control	15	C	T
240	control	53	C	T
241	control	41	C	AT
242	control	50	CT	AT
243	control	77	C	T
244	control	55	C	T
245	control	46	C	T
246	control	26	C	AT
247	control	52	C	T
248	control	55	CT	A
249	control	49	C	AT
250	control	56	C	T
251	control	41	CT	A
252	control	61	CT	AT
253	control	32	T	A
254	control	67	CT	T
255	control	61	CT	A
256	control	45	CT	AT
257	control	30	T	A
258	control	43	CT	AT
259	control	41	C	T
260	control	43	C	T
261	control	54	CT	AT
262	control	34	CT	A
263	control	42	T	A
264	control	57	T	A
265	control	76	C	T
266	control	24	CT	AT
267	control	49	C	T
268	control	36	T	A
269	control	50	C	T
270	control	39	C	T
271	control	54	C	A
272	control	37	C	AT
273	control	65	CT	A
274	control	38	C	T
275	control	27	CT	AT
276	control	70	CT	AT
277	control	44	C	AT
278	control	38	T	A
279	control	43	CT	T
280	control	42	C	T
281	control	29	C	T
282	control	39	C	A
283	control	39	C	T
284	control	37	C	T
285	control	37	CT	A
286	control	69	C	AT
287	control	39	CT	AT
288	control	45	C	T
289	control	52	CT	AT
290	control	40	C	T
291	control	44	C	A
292	control	56	T	A
293	control	30	CT	T
294	control	60	C
295	control	68	C	T
296	control	48	T	A
297	control	41	CT	AT
298	control	46	CT	AT
299	control	32	CT	AT
300	control	63	C	T
301	control	42	CT
302	control	47	C	T
303	control	46	C	AT
304	control	60	C	A
305	control	66	CT	A
306	control	86	CT	AT
307	control	46	CT	A
308	control	59	CT	A
309	control	59	C	T
310	control	45	C	T
311	control	38	C	AT
312	control	49	T	A
313	control	42	C	A
314	control	47	CT	AT
315	control	57	C	T
316	control	63	CT	AT
317	control	59	C	T
318	control	63	C	A
319	control	51	C	T
320	control	59	C	AT
321	control	56	C	T
322	control	58	CT	AT
323	control	68	CT	AT
324	control	74	CT	AT
325	control	56	CT	AT
326	control	58	CT	AT
327	control	57	T	AT
328	control	62	C	AT
329	control	55	C	T
330	control	67	C	T
331	control	77	CT	AT
332	control	55	C	AT
333	control	48	T	A
334	control	86	C	T
335	control	57	C	A
336	control	70	CT	AT
337	control	76	T	A
338	control	54	CT	AT
339	control	76	CT	AT
340	control	53	C	T
341	control	74	C	AT
342	control	63	C	T
343	control	76	CT	A
344	control	59	T	AT
345	control	50	C	T
346	control	79	CT	AT
347	control	51	C	T
348	control	70	C	T
349	control	58	CT	AT
350	control	57	T	A
351	control	60	C	AT
352	control	53	CT	AT
353	control	47	C	T
354	control	51	C	T
355	control	75	CT	AT
356	control	56	CT	A
357	control	79	CT	A
358	control	51	CT	AT
359	control	81	C	T
360	control	59	CT	A
361	control	72	C	T
362	control	76	CT	AT
363	control	72	CT	A
364	control	46	T	A
365	control	64	C	AT
366	control	85	C	AT
367	control	51	C	AT
368	control	82	C	T
369	control	45	CT	AT
370	control	47	C	T
371	control	57	C	AT
372	control	75	CT	A
373	control	76	C	T
374	control	67	CT	AT
375	control	53	T	AT
376	control	64	C	AT
377	control	46	T	A
378	control	49	CT	AT
379	control	42	C	AT
380	control	38	C	T
381	control	54	CT	AT
382	control	51	CT	T
383	control	68	C	T
384	control	67	T	A
385	control	55	C	AT
386	control	62	CT	A
387	control	46	C
388	control	58	C	T
389	control	55	CT	AT
390	control	29	CT	A
391	control	56	C	T
392	control	75	C	T
393	control	70	CT
394	control	65	CT	AT
395	control	52	C	T
396	control	72	C
397	control	63	CT	A
398	control	73	CT	AT
399	control	78	CT	AT
400	control	73	C	T
401	control	64	C	AT
402	control	67	CT	AT
403	control	71	C	T
404	control	73	CT	AT
405	control	67	C	T
406	control	65	T	A
407	control	54	T	A
408	control	72	C	A
409	control	63	C	T
410	control	69	C	T
411	control	59	C	AT
412	control	62	CT	AT
413	control	73	C	T
414	control	76	CT	AT
415	control	60	C	AT
416	control	68	CT	T
417	control	59	T	A
418	control	62	CT	A
419	control	49	CT	A
420	control	42	C	T
421	control	92	C	A
422	control	61	C	A
423	control	55	C	T
424	control	79	C	T
425	control	39	CT	T
426	control	40	C	AT
427	control	55	C	AT
428	control	46	C	T
429	control	45	C	T
430	control	28	C	A
431	control	44	C	T
432	control	36	C	A
433	control	57	C	T
434	control	36	C	T
435	control	32	C	T
436	control	63	CT	A
437	control	69	C	AT
438	control	51	C	T
439	control	43		AT
440	control	33	C	T
441	control	50	CT
442	control	60	CT	A
443	control	39	CT	AT
444	control	45	CT
445	control	36	CT	A
446	control	39	T	A
447	control	37	CT	A
448	control	50	C	AT
449	control	41	C	AT
450	control	47	C	AT
451	control	64	CT	AT
452	control	64	CT	AT
453	control	42	C	AT
454	control	52	CT	A
455	control	31	C	T
456	control	33	CT	A
457	control	52	C	AT
458	control	46	C	A
459	control	40	CT	A
460	control	48	C	T
461	control	33	C	AT
462	control	43	C	AT
463	control	47	CT	AT
464	control	53	C	AT
465	control	49	CT	A
466	control	41	CT	AT
467	control	54	C	T
468	control	67	CT	A
469	control	46	C	A
470	control	59	CT	AT
471	control	57	CT	T
472	control	84	C	T
473	control	60	CT	AT
474	control	72	CT	AT
475	control	67	C	T
476	control	71	CT	AT
477	control	75	C	AT
478	control	69	C	T
479	control	69	C
480	control	58	C	T
481	control	80	CT	AT
482	control	42	C	AT
483	control	74	C	T
484	control	77	C	AT
485	control	34	T	A
486	control	70		A
487	control	59		AT
488	control	80	CT
489	control	76	CT	AT
490	case	56	T	A
491	case	39	CT	AT
492	case	65	CT	A
493	case	50	C
494	case	44	T	AT
495	case	51	CT	T
496	case	34	C	T
497	case	46	C	T
498	case	62	C	T
499	case	23	CT	T
500	case	30	CT	AT
501	case	73	CT	AT
502	case	58	CT	T
503	case	43	C	T
504	case	25	CT	AT
505	case	38	CT	AT
506	case	48	C	T
507	case	60	CT	AT
508	case	54	C	AT
509	case	48	C	T
510	case	66	CT
511	case	44	CT
512	case	44	CT
513	case	46	C	T
514	case	54	CT	A
515	case	44	CT	AT
516	case	37	C	T
517	case	39	CT	AT
518	case	60	CT	A
519	case	57	CT	AT
520	case	50	CT	A
521	case	53	CT	A
522	case	67	CT	AT
523	case	54	T	A
524	case	55	C	T
525	case	57	C	T
526	case	45	C	A
527	case	50	CT	AT
528	case	41	C	T
529	case	56	CT	AT
530	case	46	T	A
531	case	56	CT	AT
532	case	44	CT	AT
533	case	45	T	A
534	case	69	CT	AT
535	case	33	C	T
536	case	56	C	T
537	case	73	CT	AT
538	case	31	CT	T
539	case	58	C
540	case	23	C	T
541	case	37	C	T
542	case	38	CT	A
543	case	28	CT	A
544	case	56	CT	AT
545	case	53	C	A
546	case	52	T	A
547	case	46	C	AT
548	case	47	C	T
549	case	54	CT	AT
550	case	46	T	A
551	case	44	T	A
552	case	34	CT	A
553	case	55	CT	A
554	case	59	C	T
555	case	70	CT	A
556	case	48	C
557	case	53	C
558	case	58	CT	A
559	case	17	CT	AT
560	case	41	C	AT
561	case	59	CT	A
562	case	36	C	T
563	case	46	CT
564	case	58	CT	T
565	case	55	CT	AT
566	case	56	CT	A
567	case	61	C	T
568	case	61	T	A
569	case	60	C	AT
570	case	44	C	T
571	case	40	T	A
572	case	49	C	T
573	case	46	T	A
574	case	57	C	T
575	case	50	C	AT
576	case	57	CT	A
577	case	53	CT	AT
578	case	53	CT	A
579	case	66	C	T
580	case	56	C	A
581	case	46	CT	A
582	case	53	C	AT
583	case	50	C	T
584	case	34	CT	T
585	case	55	CT	T
586	case	54	T	A
587	case	50	T	A
588	case	29	C	T
589	case	51	CT
590	case	46	C	AT
591	case	55	C	T
592	case	26	C	T
593	case	29	C	T
594	case	57	T	A
595	case	59	T	T
596	case	33	T	A
597	case	46	C	A
598	case	57	C	AT
599	case	39	C	AT
600	case	55	CT	A
601	case	62	C	T
602	case	64	CT	AT
603	case	65	CT	A
604	case	44	CT	AT
605	case	63	T	A
606	case	44	C	A
607	case	56	C	AT
608	case	47	C	AT
609	case	55	C	T
610	case	53	C	AT
611	case	56	CT	AT
612	case	53	T	A
613	case	49	T	A
614	case	68	CT	A
615	case	53	T	A
616	case	39	CT	AT
617	case	60	CT	AT
618	case	32	T	A
619	case	59	CT	A
620	case	46	CT	AT
621	case	78	CT	T
622	case	51	C	T
623	case	71	CT	AT
624	case	41	C	T
625	case	51	C	T
626	case	65	C	A
627	case	63	CT	AT
628	case	54	T	A
629	case	54	C	T
630	case	59	CT	AT
631	case	51	C	T
632	case	48	CT	AT
633	case	32	C	T
634	case	54	CT
635	case	17	CT	T
636	case	42	C	T
637	case	54	C	A
638	case	56	C
639	case	50	C	AT
640	case	37	CT	T
641	case	26	CT	AT
642	case	24	CT	AT
643	case	45	CT	A
644	case	62	C	T
645	case	38	CT	AT
646	case	55	T	A
647	case	53	CT	AT
648	case	64	CT	A
649	case	68	T	A
650	case	33	C
651	case	59	C	T
652	case	51	CT	AT
653	case	31	T	A
654	case	37	C	T
655	case	49	C	AT
656	case	47	C	AT
657	case	49	T	A
658	case	57	T
659	case	53	CT	AT
660	case	51	C	A
661	case	53	CT	AT
662	case	39	C	T
663	case	52	T	A
664	case	47	CT
665	case	26	CT	AT
666	case	53	C
667	case	60	T	A
668	case	55	CT	AT
669	case	53	T	A
670	case	66	C	T
671	case	45	CT
672	case	34	CT	AT
673	case	43	T	A
674	case	54	CT	A
675	control	47	C	AT
676	control	56	T	T
677	control	49	CT	AT
678	control	56	CT	T
679	control	47	T	T
680	control	58	CT	T
681	control	58	CT	T
682	control	58	T
683	control	51	C	T
684	control	45	C	T
685	control	47	CT	T
686	control	50		AT
687	control	46	T	AT
688	control	45	CT
689	control	52	C	T
690	control	59	CT
691	control	51	CT	T
692	control	46	CT	AT
693	control	56	C	AT
694	control	58	C	T
695	control	47	CT	AT
696	control	56	C	T
697	control	55	CT	AT
698	control	58	C	T
699	control	60	T	AT
700	control	61		AT
701	control	44	CT
702	control	54	CT	T
703	control	46	CT	T
704	control	54	C	T
705	control	52	C	T
706	control	48	CT	AT
707	control	61	C	T
708	control	56	CT	AT
709	control	56	C	T
710	control	53	C	T
711	control	53	CT	T
712	control	53	T	A
713	control	60	T	AT
714	control	58	T	A
715	control	46	T	AT
716	control	45	CT	A
717	control	56	CT	AT
718	control	47	C	T
719	control	49	C	T
720	control	53	CT	A
721	control	62	CT	AT
722	control	59	C	T
723	control	56	C	T
724	control	50	C	T
725	control	54	C	T
726	control	53	CT	AT
727	control	50	C	T
728	control	47	C	AT
729	control	52	T	AT
730	control	47	C	T
731	control	50	CT	AT
732	control	53	C	T
733	control	54	C	A
734	control	56	C	T
735	control	49	C	T
736	control	62	T	A
737	control	58	CT	AT
738	control	58	CT	AT
739	control	60	C	T
740	control	58	C	AT
741	control	49	C	T
742	control	47	C	T
743	control	55	CT	AT
744	control	58	C	T
745	control	46	T	AT
746	control	52	C	T
747	control	60	CT	AT
748	control	57	T	A
749	control	45	C	AT
750	control	57	CT	AT
751	control	56	C	T
752	control	58	C	AT
753	control	47	CT	AT
754	control	49	CT	A
755	control	46	T	AT
756	control	58	C	T
757	control	46	T	A
758	control	50	C	AT
759	control	51	C	AT
760	control	57	CT	AT
761	control	50	CT	A
762	control	59	C	T
763	control	51	CT	AT
764	control	53	CT	AT
765	control	51	C	T
766	control	56	C	T
767	control	55	CT	AT
768	control	48	T	A
769	control	56	CT	AT
770	control	50	CT	AT
771	control	48	C	T
772	control	61	C	T
773	control	47	CT	AT
774	control	51	CT	T
775	control	63	CT	A
776	control	56	CT	AT
777	control	64	C	T
778	control	50	C	T
779	control	58		AT
780	control	58	CT	A
781	control	55	CT	AT
782	control	58	CT	T
783	control	58	C	AT
784	control	62	CT	AT
785	control	63	C	T
786	control	60	CT	AT
787	control	50	T	AT
788	control	57	CT	AT
789	control	63	CT	A
790	control	58	C	T
791	control	57	CT	AT
792	control	72	C	AT
793	control	58	CT	AT
794	control	42	CT	AT
795	control	39	CT	AT
796	control	48	C	AT
797	control	59	CT	AT
798	control	42	CT	A
799	control	52	T	A
800	control	55	CT	AT
801	control	33	C	AT
802	control	53	C	AT
803	control	37	T	A
804	control	25	CT	AT
805	control	35	CT	AT
806	control	43	C	T
807	control	38	CT	A
808	control	75	CT	A
809	control	68	C	T
810	control	52	C	T
811	control	62	T	A
812	control	60	CT	AT
813	control	36	CT	AT
814	control	50	C	T
815	control	30	T	A
816	control	28	CT	A
817	control	40	C	T
818	control	30	C	T
819	control	29	CT	AT
820	control	26	CT	T
821	control	34	C	T
822	control	32	C	T
823	control	55	CT
824	control	33	CT	AT
825	control	33	CT	T
826	control	38	CT	A
827	control	50	CT	AT
828	control	41	CT	A
829	control	60	T	A
830	control	51	CT	AT
831	control	73	CT	A
832	control	67	C	T
833	control	52	T	A
834	control	53	C	AT
835	control	52	C	T
836	control	64	C
837	control	63	C	T
838	control	57	CT	AT
839	control	49	CT	AT
840	control	51	CT	T
841	control	62	C	AT
842	control	57	CT	A
843	control	19	CT	AT
844	control	56	C	AT
845	control	45	CT	AT
846	control	59	CT	AT
847	control	59	CT	AT
848	control	43	CT	AT
849	control	49	CT	AT
850	control	50	CT	AT
851	control	55	T	A
852	control	45	CT	AT
853	control	67	C	T
854	control	36	CT	AT
855	control	38	C	T
856	control	27	C	T
857	control	60	CT	AT
858	control	41	CT	AT
859	control	46	C	T
860	control	35	C	T
861	control	36	C	AT
862	control	50	C	AT
863	control	70	C	AT
864	control	27	CT	AT
865	control	36	CT	A
866	control	52	C	A
867	control	47	C	T
868	control	44	CT	AT
869	control	43	CT	AT
870	control	65	CT	AT
871	control	52	C	AT
872	control	54	CT	AT
873	control	49	T	A
874	control	47	C	T
875	control	49	CT	T
876	control	32	CT	AT
877	control	33	CT	AT
878	control	51	C	T
879	control	52	CT	A
880	control	18	C	T
881	control	51	CT	AT
882	control	55	C	T
883	control	31	C	AT
884	control	46	T	A
885	control	48	C	T
886	control	47	CT	AT
887	control	63	CT	AT
888	control	20	CT	AT
889	control	45	CT	A
890	control	48	C	T
891	control	41	C	T
892	control	43	C	AT
893	control	46	C	AT
894	control	38	C	T
895	control	73	C	T
896	control	38		T
897	control	23	C	AT
898	control	43	C	T
899	control	66	CT	AT
900	control	53	CT	AT
901	control	20	C
902	control	31	C	T
903	control	50	C
904	control	50	CT	A
905	control	60	CT	AT
906	control	69	CT	AT
907	control	43	CT	AT
908	control	51	C	AT
909	control	40	C	AT
910	control	46	CT	AT
911	control	36	CT	AT
912	control	31	T	A
913	control	56	CT	AT
914	control	56	CT	AT
915	control	49	C	T
916	control	49	CT	A
917	control	43	C	T
918	control	30	CT	AT
919	control	37	CT	AT
920	control	43	C	T
921	control	57	C	T
922	control	60	C	T
923	control	28	T	A
924	control	54	T	A
925	control	52	T	A
926	control	72	C	AT
927	control	46	CT	AT
928	control	51	CT	AT
929	control	56	C	T
930	control	52	C	AT
931	control	57	CT	A
932	control	43	CT	T
933	control	58	CT	A
934	control	25	CT	A
935	control	26	C	T
936	control	38	T	A
937	control	48	CT	A
938	control	34	CT	T
939	control	27	CT	AT
940	control	49	CT	AT
941	control	47	C	A
942	control	38	C	T
943	control	66	C	T
944	control	51	C	T
945	control	36	C	A
946	control	44	C	T
947	control	31	CT	AT
948	control	60	C	T
949	control	32	C	T
950	control	54	C	T
951	control	63	T	A
952	control	56	C	AT
953	control	34	C	AT
954	control	28	C	AT
955	control	71	C	AT
956	control	59	CT	A
957	control	56	T	A
958	control	50	C	AT
959	control	37	CT	A
960	control	43	C	T
961	control	57	C	AT
962	control	40	C	T
963	control	30	CT	A
964	control	36	T	A
965	control	24	CT	AT
966	control	68	CT	AT
967	control	59	CT	A
968	control	49	CT	AT
969	control	60	T	A
970	control	72	CT	AT
971	control	57	CT	AT
972	control	34	CT	A
973	control	53	CT	AT
974	control	49	C	AT
975	control	48	T	A
976	control	37	T	A
977	control	48	CT	A
978	control	43	C	T
979	control	60	CT	A
980	control	46	CT	AT
981	control	34	CT	T
982	control	29	CT	AT
983	control	60	T	A
984	control	30	C	T
985	control	55	CT	A
986	control	56	C	AT
987	control	55	CT	AT
988	control	28	CT	A
989	control	44	C	T
990	control	47	C	AT
991	control	60	T	A
992	control	57	C	AT
993	control	65	CT	AT
994	control	67	CT	AT
995	control	52	CT	AT
996	control	39	CT	A
997	control	56	C	T
998	control	37	C	AT
999	control	52	CT	AT
1000	control	45	C	T
1001	control	47	CT	A
1002	control	20	C	T
1003	control	62	CT	AT
1004	control	66	T	A
1005	control	36	C	T
1006	control	43	C	T
1007	control	37	C	T
1008	control	65	CT	A
1009	control	51	CT	A
1010	control	38	CT	A
1011	control	51	CT	A
1012	control	55	C	AT
1013	control	21	C	T
1014	control	42	C	T
1015	control	61	CT
1016	control	62	CT	AT
1017	control	25	C	T
1018	control	54	C	AT
1019	control	64	CT	AT
1020	control	42	CT	AT
1021	control	67	C	T
1022	control	38	C	T
1023	control	40	CT	AT
1024	control	41	C	T
1025	control	28	C	T
1026	control	65	C	T
1027	control	51	C	T
1028	control	41	CT	AT
1029	control	51	CT	A
1030	control	30	T	A
1031	control	54	CT	AT
1032	control	60	CT	A
1033	control	74	C	T
1034	control	22	C	T
1035	control	21	T	A
1036	control	51	CT	AT
1037	control	45	CT	T
1038	control	35	T	A
1039	control	37	C	T
1040	control	33	CT	A
1041	control	48	C	T
1042	control	42	C	AT
1043	control	38	C	A
1044	control	42	C	T
1045	control	49	CT	AT
1046	control	49	C	T
1047	control	41	T	A
1048	control	57	C	T
1049	control	53	CT	AT
1050	control	54	C
1051	control	59	C	T
1052	control	62	C	T
1053	control	69	C	T
1054	control	60	C	T
1055	control	51		AT
1056	control	40	CT	AT
1057	control	44	C	T
1058	control	28	C	T
1059	control	60	C	T
1060	control	41	CT	AT
1061	control	37	C	AT
1062	control	51	C	A
1063	control	40	C	T
1064	control	40	CT	AT
1065	control	73	C	T
1066	control	53	C	T
1067	control	34	T	A
1068	control	34	CT	AT
1069	control	23	C	T
1070	control	54	C	T
1071	control	38	C	T
1072	control	41	CT	AT
1073	control	52	CT	AT
1074	control	55	C	AT
1075	control	34	T	A
1076	control	53	C	T
1077	control	44	CT	T
1078	control	42	CT	A
1079	control	61	CT	AT
1080	control	60	C	AT
1081	control	55	C	AT
1082	control	54	C	AT
1083	control	56	CT	AT
1084	control	62	C	T
1085	control	54	C	T
1086	control	52	C	A
1087	control	61	T	A
1088	control	65	T	A
1089	control	56	C	AT
1090	control	58	CT
1091	control	51	CT	AT
1092	control	66	C	A
1093	control	61		A
1094	control	58	CT	A
1095	control	53	CT	AT
1096	control	52	T	A
1097	control	40	CT	AT
1098	control	43	CT	AT
1099	control	54	T	A
1100	control	49	CT	AT
1101	control	66	CT	T
1102	control	67	C	AT
1103	control	43	C	T
1104	control	25	CT	AT
1105	control	60	C	T
1106	control	58	C	T
1107	control	24	CT	AT
1108	control	25	C	T
1109	control	25	CT	AT
1110	control	34	C	AT
1111	control	30	C	AT
1112	control	22	C	AT
1113	control	37	C	T
1114	control	22	CT	AT
1115	control	22	T	A
1116	control	39	CT	AT
1117	control	30	C	T
1118	control	57	CT	AT
1119	control	46	C	T
1120	control	37	C	T
1121	control	36	CT	A
1122	control	53	C	T
1123	control	61	T	A
1124	control	44	CT	AT
1125	control	62	CT	AT
1126	control	39	C	AT
1127	control	47	T	A
1128	control	52	C	T
1129	control	36	C	T
1130	control	39	CT	AT
1131	control	34	CT	AT
1132	control	44	C	A
1133	control	46	C	T
1134	control	43	C	T
1135	control	38	CT	A
1136	control	33	CT	AT
1137	control	30	C	T
1138	control	37	C	T
1139	control	26	CT	AT
1140	control	36	T	A
1141	control	37	C	T
1142	control	28	C	T
1143	control	41	C	T
1144	control	49	CT	AT
1145	control	50	CT	A
1146	control	19	C	AT
1147	control	18	T	A
1148	control	19	C	AT
1149	control	66	CT	A
1150	control	57	C
1151	control	52	CT	AT
1152	control	54	CT	AT
1153	control	52	CT	AT
1154	control	58	CT	A
1155	control	69	C	T
1156	control	53	C	T
1157	control	51	CT	A
1158	control	60	C	T
1159	control	30	C	A
1160	control	53	CT	AT
1161	control	34	C	A
1162	control	32	C	T
1163	control	54	CT	A
1164	control	59	C	T
1165	control	44	C	T
1166	control	27	CT	AT
1167	control	34	C	T
1168	control	26	CT	AT
1169	control	46	C	T
1170	control	49	CT	A
1171	control	52	C	AT
1172	control	45	CT	AT
1173	control	37	CT	A
1174	control	33	CT	AT
1175	control	48	CT	AT
1176	control	60	C	T
1177	control	54	C	AT
1178	control	27	C	T
1179	control	51	CT	AT
1180	control	44	CT	AT
1181	control	30	CT	AT
1182	control	49	C	T
1183	control	63	CT	AT
1184	control	55	CT	AT
1185	control	52	C	T
1186	control	54	CT	AT
1187	control	44		A
1188	control	64	CT	AT
1189	control	42	CT	AT
1190	control	39	CT	A
1191	control	44	C	T
1192	control	24	C	A
1193	control	41	CT	A
1194	control	53	CT	AT
1195	control	40	T	A
1196	control	36	C	AT
1197	control	56	C	T
1198	control	56	CT	AT
1199	control	60	C	T
1200	control	57	CT	A
1201	control	43	C	AT
1202	control	49	CT	AT
1203	control	49	CT	AT
1204	control	39	C	AT
1205	control	43	C	AT
1206	control	52	CT	AT
1207	control	59	C	T
1208	control	58	C	AT
1209	control	57	CT	A
1210	control	48	C	T
1211	control	62	C	T
1212	control	62	T	AT
1213	control	74	C	T
1214	control	41	C	A
1215	control	48	T	A
1216	control	23	T	A
1217	control	19	C	T
1218	control	39	T	A
1219	control	38	C	T
1220	control	51	C	T
1221	control	31	C	AT
1222	control	43	CT	AT
1223	control	25	CT	A
1224	control	58	CT	AT
1225	control	59	C	AT
1226	control	72	C	T
1227	control	45	CT	A
1228	control	65	CT	AT
1229	control	59	CT	AT
1230	control	36	CT	A
1231	control	55	C	T
1232	control	61	CT	AT
1233	control	37	C	T
1234	control	27	C	T
1235	control	59	C	AT
1236	control	57	CT	A
1237	control	28	C	T
1238	control	30	CT	AT
1239	control	46	CT	A
1240	control	19	C	AT
1241	control	29	CT	AT
1242	control	41	CT	AT
1243	control	61	CT	AT
1244	control	42	CT	AT
1245	control	34	CT	A
1246	control	32	C	AT
1247	control	58	CT	A
1248	control	60	CT	A
1249	control	52	CT	T
1250	control	24	C	T
1251	control	46	CT
1252	control	71	C	T
1253	control	44	T	AT
1254	control	30	CT	AT
1255	control	30	C	T
1256	control	29	CT	A
1257	control	41	CT	A
1258	control	52	CT	AT
1259	control	55	T	A
1260	control	52	C	AT
1261	control	62	CT	T
1262	control	52	C	T
1263	control	36	C	T
1264	control	58	C	A
1265	control	25	CT	AT
1266	control	53	CT	AT
1267	control	47	C	AT
1268	control	51	T	A
1269	control	40	C	T
1270	control	45	CT	AT
1271	control	43	CT	AT
1272	case	39	C	T
1273	case	65		AT
1274	case	57	C	T
1275	case	51	CT	AT
1276	case	51	CT	AT
1277	case	63	C	A
1278	case	64	CT	AT
1279	case	63	C	T
1280	case	47	C	T
1281	case	60	C	T
1282	case	61	CT	T
1283	case	74	CT	AT
1284	case	61	T	AT
1285	case	54	CT	AT
1286	case	62	C	T
1287	case	62	CT	AT
1288	case	57	CT	AT
1289	case	57	CT	AT
1290	case	59	T	T
1291	case	57	C	T
1292	case	72	CT	A
1293	case	67	C	T
1294	case	61	C	AT
1295	case	61	CT	AT
1296	case	60		T
1297	case	56	C	T
1298	case	38	C	AT
1299	case	55	T	AT
1300	case	36	CT	AT
1301	case	49		AT
1302	case	87	C	T
1303	case	89	CT	AT
1304	case	45	CT	A
1305	case	34	CT	A
1306	case	31	C	T
1307	case	63	CT	AT
1308	case	45	C	T
1309	case	36	CT	AT
1310	case	37	C	A
1311	case	48	C	T
1312	case	55	C	T
1313	case	48	T	A
1314	case	64	T	A
1315	case	56	CT	AT
1316	case	24	C	T
1317	case	46	C	T
1318	case	55	C	T
1319	case	59	CT
1320	case	47	C	T
1321	case	69	C	AT
1322	case	42	C	T
1323	case	43	CT	A
1324	case	29	C	T
1325	case	61	CT	A
1326	case	56	C	A
1327	case	53	CT	AT
1328	case	38	C	T
1329	case	41	C	T
1330	case	46	C	A
1331	case	57	C	AT
1332	case	54	CT	AT
1333	case	51	T	A
1334	case	38	CT	AT
1335	case	46	CT	AT
1336	case	66	C	AT
1337	case	55	C	T
1338	case	51	CT	AT
1339	case	64	C	T
1340	case	47	C	A
1341	case	37	C
1342	case	58	T	A
1343	case	44	T	A
1344	case	25	CT	A
1345	case	39	C
1346	case	40	CT	AT
1347	case	43	C	T
1348	case	57	C	T
1349	case	64	CT	AT
1350	case	51	C	AT
1351	case	47	C	AT
1352	case	45	C	AT
1353	case	47	C	A
1354	case	55	C	AT
1355	case	57	C	AT
1356	case	39	CT	A
1357	case	55	CT	AT
1358	case	45	C	T
1359	case	56	C	T
1360	case	29	C	AT
1361	case	58	CT
1362	case	40	CT	AT
1363	case	29	C	T
1364	case	55		T
1365	case	50		T
1366	case	70	T	AT
1367	case	53	CT	A
1368	case	45	CT	AT
1369	case	48	C	T
1370	case	40	C	T
1371	case	29	CT	AT
1372	case	40	CT	AT
1373	case	59		T
1374	case	55	CT	AT
1375	case	39	T	AT
1376	case	57	C	T
1377	case	54	C	T
1378	case	62	CT	AT
1379	case	48	C	T
1380	case	47	CT	A
1381	case	68	C	T
1382	case	51	T	AT
1383	case	51	CT	AT
1384	case	30	CT	AT
1385	case	55	C	T
1386	case	36	C	T
1387	case	54	T	A
1388	case	30	CT	AT
1389	case	46	C	T
1390	case	62		AT
1391	case	62	C
1392	case	61	CT	AT
1393	case	43	C	T
1394	case	53	C	T
1395	case	57	CT	AT
1396	case	57	T	AT
1397	case	62	C	T
1398	case	28	CT	A
1399	case	54	C	AT
1400	case	54	CT	T
1401	case	28	C	T
1402	case	61	CT	AT
1403	case	28	CT	AT
1404	case	59	CT
1405	case	74	CT	AT
1406	case	46	C	AT
1407	case	45	CT
1408	case	62	C	AT
1409	case	35	CT	AT
1410	case	48	CT
1411	case	46	CT	AT
1412	case	58	CT	AT
1413	case	50	CT
1414	case	24		AT
1415	case	58	C	T
1416	case	52	CT	AT
1417	case	53	CT	A
1418	case	43	C	T
1419	case	38	C	T
1420	case	55	CT	AT
1421	case	43	CT	AT
1422	case	58	C	T
1423	case	62	C
1424	case	54	CT	AT
1425	case	35	CT	AT
1426	case	46	CT
1427	case	22	CT	AT
1428	case	47	CT	AT
1429	case	51	CT	A
1430	case	41	T	A
1431	case	41	C	T
1432	case	22	C
1433	case	70	CT	AT
1434	case	36	C	AT
1435	case	29		T
1436	case	57	T	A
1437	case	72	CT
1438	case	54	CT	A
1439	case	56	T	A
1440	case	29	C	A
1441	case	55	CT	AT
1442	case	51	CT	A
1443	case	46	C	T
1444	case	43	C	T
1445	case	43	C	AT
1446	case	44	C	T
1447	case	66	CT	AT
1448	case	60	C	T
1449	case	53	C	A
1450	case	56	CT	AT
1451	case	61	CT	A
1452	case	59	CT	AT
1453	case	54	C
1454	case	70	T
1455	case	45	T	A
1456	case	45		A
1457	case	61	C	T
1458	case	63	T	A
1459	case	63	CT	T
1460	case	61	C	AT
1461	case	48	CT	AT
1462	case	70	T	A
1463	case	68	T	A
1464	case	47	T
1465	case	34	C
1466	case	82	CT
1467	case	49	CT	AT
1468	case	47	T	A
1469	case	60	CT	AT
1470	case	48	CT	A
1471	case	56	CT	A
1472	case	45	C	AT
1473	case	35	CT	A
1474	case	63	CT
1475	case	62		T
1476	case	50	C	AT
1477	case	44	CT	A
1478	case	55	C
1479	case	40	CT	A
1480	case	54	C	T
1481	case	64	T	A
1482	case	58	CT	A
1483	case	51	C	T
1484	case	61	C	AT
1485	case	78	CT	A
1486	case	48	C	T
1487	case	47	CT	AT
1488	case	64	CT
1489	case	75	CT	A
1490	case	57	C
1491	case	58	C	AT
1492	case	58	C	A
1493	case	54	C	AT
1494	case	44	C	T
1495	case	49	CT	A
1496	case	49	C	T
1497	case	45	CT	AT
1498	case	65	CT	A
1499	case	65	T	A
1500	case	62	CT	AT
1501	case	40	C	T
1502	case	46	T	A
1503	case	57	C	T
1504	case	46	CT	AT
1505	case	47	CT	AT
1506	case	55		A
1507	case	46	C	T
1508	case	55	C	T
1509	case	60	CT	AT
1510	case	69	CT	A
1511	case	72	CT	AT
1512	case	55	C	AT
1513	case	62	C	T
1514	case	18	C	T
1515	case	45	C	T
1516	case	60	CT	T
1517	case	50	T	A
1518	case	46	C	T
1519	case	63	C	AT
1520	case	48		T
1521	case	74	CT	A
1522	case	75	C	AT
1523	case	63	CT	AT
1524	case	38	T	A
1525	case	47	C
1526	case	48	T
1527	case	63	CT	AT
1528	case	63	CT	AT
1529	case	53	CT	AT
1530	case	45	C	T
1531	case	44	CT	A
1532	case	54	C	AT
1533	case	61	C	AT
1534	case	61	CT	A
1535	case	44	C	T
1536	case	74	C	T
1537	case	50	CT	A
1538	case	43	CT	AT
1539	control	27	C	T
1540	control	27	T	A
1541	control	28	CT	AT
1542	control	26	CT	AT
1543	control	29	C	T
1544	control	29	CT	A
1545	control	32	C	T
1546	control	31	C	AT
1547	control	34	C	T
1548	control	33	C	T
1549	control	32	C	AT
1550	control	32	CT	A
1551	control	31	C	T
1552	control	31	C	T
1553	control	30	T	AT
1554	control	31	CT	AT
1555	control	30	T	A
1556	control	32	T	A
1557	control	31	C
1558	control	34	C	AT
1559	control	33	C	A
1560	control	30	CT	A
1561	control	34	C
1562	control	30	CT	AT
1563	control	33	CT
1564	control	32	C	A
1565	control	39	CT	A
1566	control	37	C	T
1567	control	38	C	T
1568	control	37	C	T
1569	control	38	T	A
1570	control	36	CT	AT
1571	control	36	C	T
1572	control	35	CT	AT
1573	control	38	C	T
1574	control	36	T	A
1575	control	37		A
1576	control	36	C	A
1577	control	37	C	T
1578	control	39	C	AT
1579	control	39	CT
1580	control	36	C	A
1581	control	38	CT	A
1582	control	39	C
1583	control	35	C	T
1584	control	37	C
1585	control	36
1586	control	36	C	AT
1587	control	39	CT	A
1588	control	39	C	T
1589	control	38	CT	A
1590	control	37	C	T
1591	control	38	CT	AT
1592	control	39	C	A
1593	control	39	T	A
1594	control	36	C	T
1595	control	37	C	T
1596	control	41	C	AT
1597	control	43	C	T
1598	control	42	C	T
1599	control	41	CT	A
1600	control	44	C	T
1601	control	44	CT
1602	control	44	C
1603	control	43	C	A
1604	control	41	C	T
1605	control	40	C	AT
1606	control	44	C	A
1607	control	41	CT	AT
1608	control	44	CT
1609	control	42	C
1610	control	42	T	A
1611	control	42	C	T
1612	control	41	CT	AT
1613	control	42	C	T
1614	control	43	C	T
1615	control	43	C	A
1616	control	41	C	T
1617	control	44	CT	AT
1618	control	43	C	AT
1619	control	44	C	A
1620	control	42	CT	AT
1621	control	40	CT	A
1622	control	41	CT	AT
1623	control	41	C	A
1624	control	40	C	A
1625	control	41	C	T
1626	control	40	C	A
1627	control	44	C	T
1628	control	42	C
1629	control	44	CT	AT
1630	control	42	CT	A
1631	control	44	CT	A
1632	control	40	CT	A
1633	control	40	C
1634	control	42	C	T
1635	control	42	CT	A
1636	control	43	CT	A
1637	control	40	CT	A
1638	control	43	CT	A
1639	control	41	CT
1640	control	40	CT
1641	control	42	CT
1642	control	44	C	T
1643	control	41	C	T
1644	control	42	C	A
1645	control	43	C	T
1646	control	44	CT	A
1647	control	41	T	A
1648	control	41	T	A
1649	control	44	C	T
1650	control	44	C	T
1651	control	44	CT	A
1652	control	40	CT
1653	control	40	CT	A
1654	control	41	C
1655	control	43	C	T
1656	control	44	C	A
1657	control	42	C
1658	control	40	C	AT
1659	control	43	C	A
1660	control	43	CT	AT
1661	control	41	CT
1662	control	45	CT	A
1663	control	46		T
1664	control	49	C	AT
1665	control	47	CT	A
1666	control	49	C	AT
1667	control	49	CT	A
1668	control	49	C	T
1669	control	46	CT	AT
1670	control	45	C	T
1671	control	48	CT	A
1672	control	45	CT	A
1673	control	47	C	T
1674	control	46	C	AT
1675	control	46	CT	AT
1676	control	46	C	A
1677	control	48	C	T
1678	control	48	C	A
1679	control	47	CT	AT
1680	control	48	C	AT
1681	control	46	CT	AT
1682	control	47	CT	A
1683	control	47	C	T
1684	control	45	CT
1685	control	45	C	T
1686	control	49	CT	A
1687	control	49	T	AT
1688	control	49	CT	T
1689	control	48	CT	T
1690	control	48	C	T
1691	control	48	CT	AT
1692	control	45	CT	T
1693	control	47	C	T
1694	control	46	CT	AT
1695	control	46	CT	T
1696	control	48	C	AT
1697	control	46	CT	T
1698	control	47		AT
1699	control	46	C	AT
1700	control	47	CT	T
1701	control	48	C	T
1702	control	48	C	AT
1703	control	47	C	T
1704	control	48	CT	T
1705	control	48	C	T
1706	control	48	CT	AT
1707	control	49	C	T
1708	control	47	T	A
1709	control	49	C	AT
1710	control	46	CT	A
1711	control	45	T	A
1712	control	48	CT	AT
1713	control	46	CT	A
1714	control	48	C	T
1715	control	46	CT	A
1716	control	46	C	A
1717	control	46	C	T
1718	control	46	CT	AT
1719	control	45	C	T
1720	control	49	C	AT
1721	control	46	CT	A
1722	control	47	CT	A
1723	control	46	T	A
1724	control	45	C	T
1725	control	46	C	T
1726	control	47	C	T
1727	control	45	CT	AT
1728	control	45	C	A
1729	control	46	C	AT
1730	control	48	CT	AT
1731	control	47	CT	A
1732	control	47	C	T
1733	control	49	CT	AT
1734	control	48	CT	A
1735	control	45	C	A
1736	control	46	C	A
1737	control	49	C	T
1738	control	47	CT
1739	control	46	CT	A
1740	control	49	C	T
1741	control	49	C	AT
1742	control	46	C	T
1743	control	48	C	A
1744	control	45	CT	A
1745	control	48	C
1746	control	45	C	A
1747	control	48	CT	A
1748	control	48	CT	A
1749	control	49	CT
1750	control	45	C	T
1751	control	46	CT	T
1752	control	45	C	A
1753	control	45	CT	AT
1754	control	45	CT
1755	control	48	CT
1756	control	47	CT
1757	control	49	C	AT
1758	control	45	C	AT
1759	control	46	C	T
1760	control	45	C	T
1761	control	48	CT	T
1762	control	51	T	A
1763	control	53	C	AT
1764	control	53	C
1765	control	52	T	AT
1766	control	51	C	T
1767	control	51	C	T
1768	control	53	C	T
1769	control	50	CT	A
1770	control	52	T	A
1771	control	53	C	A
1772	control	52	CT	A
1773	control	52	C	A
1774	control	50	C	A
1775	control	51	CT	AT
1776	control	50	C	T
1777	control	53		AT
1778	control	53	CT	AT
1779	control	50	CT	AT
1780	control	52	C	T
1781	control	54	CT	T
1782	control	54	CT	AT
1783	control	51	CT	A
1784	control	53	CT	AT
1785	control	54	C	AT
1786	control	54	T	A
1787	control	50	CT	AT
1788	control	54	C	T
1789	control	52	C	A
1790	control	51	CT	A
1791	control	54	C	AT
1792	control	50	CT	AT
1793	control	53	C	T
1794	control	54	C	AT
1795	control	53	CT	T
1796	control	50	T	A
1797	control	52	CT	AT
1798	control	52	T	AT
1799	control	53	CT	AT
1800	control	53	C	AT
1801	control	52	CT	T
1802	control	54	CT	T
1803	control	52	CT	T
1804	control	52	CT	AT
1805	control	52	CT	T
1806	control	54	C	T
1807	control	52	CT	AT
1808	control	51	C	T
1809	control	51	C	T
1810	control	54	CT	AT
1811	control	50	C	AT
1812	control	50	C	T
1813	control	54	C	T
1814	control	51	CT	AT
1815	control	50	CT	A
1816	control	54	CT	T
1817	control	54	CT	T
1818	control	51	CT	AT
1819	control	52	T	A
1820	control	53	CT	AT
1821	control	51	C	T
1822	control	51	CT	AT
1823	control	54	C	A
1824	control	54	C	A
1825	control	54	T	A
1826	control	51	CT	A
1827	control	50	CT
1828	control	54	C	T
1829	control	50	CT
1830	control	53	C	T
1831	control	51	C	T
1832	control	51	C	T
1833	control	52	CT	A
1834	control	54	CT	AT
1835	control	52	C	T
1836	control	51	C	AT
1837	control	52	C	T
1838	control	51	T	A
1839	control	51	CT	A
1840	control	51	CT	AT
1841	control	50	T	A
1842	control	50	CT	AT
1843	control	50		T
1844	control	52	C	T
1845	control	54	T	AT
1846	control	52	C	AT
1847	control	50	C	AT
1848	control	54	CT	AT
1849	control	54	T	A
1850	control	50	CT	A
1851	control	53	T	A
1852	control	54	T
1853	control	52	T	A
1854	control	51	C	T
1855	control	50	CT
1856	control	53	T	AT
1857	control	51	C	T
1858	control	53	C	AT
1859	control	52		A
1860	control	50	C	AT
1861	control	50		T
1862	control	51	C	T
1863	control	53	CT	A
1864	control	52	T	AT
1865	control	50	C	T
1866	control	52	CT	A
1867	control	52	CT	T
1868	control	54	CT	A
1869	control	51	T	A
1870	control	53	C
1871	control	50	CT
1872	control	54	CT	AT
1873	control	50	T
1874	control	52	CT	A
1875	control	51	C	A
1876	control	51	CT	AT
1877	control	50	CT	A
1878	control	50	CT	AT
1879	control	51	C	T
1880	control	54	C	T
1881	control	54	CT	AT
1882	control	52	CT	A
1883	control	53	C	T
1884	control	50	C	T
1885	control	53	C	T
1886	control	52	C	T
1887	control	53	C	T
1888	control	54	CT	AT
1889	control	52	C
1890	control	52	CT	AT
1891	control	52	C	A
1892	control	55	C	T
1893	control	57	C	T
1894	control	57	C	T
1895	control	56	CT	T
1896	control	58	C	AT
1897	control	56	CT	A
1898	control	59	CT	A
1899	control	58	CT	AT
1900	control	56	C	T
1901	control	57	C
1902	control	59	T	A
1903	control	56	CT	A
1904	control	55	CT	AT
1905	control	55	CT	A
1906	control	55	CT	A
1907	control	59	C	T
1908	control	56	CT	AT
1909	control	57	CT	AT
1910	control	58	T	A
1911	control	58	C	A
1912	control	56	C	A
1913	control	57	C	T
1914	control	55	C	AT
1915	control	55	T	A
1916	control	57	C	T
1917	control	57	C	T
1918	control	58	C	T
1919	control	59	CT	AT
1920	control	58	C	T
1921	control	59	CT	A
1922	control	55	C	AT
1923	control	58	CT	T
1924	control	57	C	T
1925	control	56	C	AT
1926	control	59	C
1927	control	57	CT	T
1928	control	59	CT	T
1929	control	55	CT
1930	control	55	C	T
1931	control	57	T	T
1932	control	56	CT	T
1933	control	56	C	T
1934	control	59	C	T
1935	control	57	C	T
1936	control	57	T	AT
1937	control	58	C	T
1938	control	55	C	AT
1939	control	58	CT	AT
1940	control	58	T	AT
1941	control	59	C	AT
1942	control	57	CT	T
1943	control	56	CT	T
1944	control	55	CT	T
1945	control	56	T	AT
1946	control	56	C	T
1947	control	55	T	T
1948	control	55	C	T
1949	control	57	CT	T
1950	control	55	C	AT
1951	control	56	C
1952	control	55	CT	T
1953	control	57	C	T
1954	control	55	CT	A
1955	control	59	CT	A
1956	control	57	C	AT
1957	control	55	C	T
1958	control	59	C	T
1959	control	56	C	T
1960	control	56	C	A
1961	control	56	C	A
1962	control	55	C	T
1963	control	59	C	T
1964	control	55	C	AT
1965	control	59	C
1966	control	56	C	T
1967	control	55	C	T
1968	control	57	C	AT
1969	control	55	CT	A
1970	control	59	CT	A
1971	control	59	C	T
1972	control	56	CT	A
1973	control	57	C
1974	control	57	CT	A
1975	control	55	C	T
1976	control	57	CT	A
1977	control	58		A
1978	control	58	T	A
1979	control	59	CT	A
1980	control	55	C	T
1981	control	59	C	T
1982	control	55	CT	AT
1983	control	57	CT	A
1984	control	56	CT	A
1985	control	57	C	A
1986	control	57	CT	A
1987	control	57	C	T
1988	control	58	C	T
1989	control	59	C	A
1990	control	59	CT	A
1991	control	55	CT	T
1992	control	57	C	T
1993	control	56	CT	A
1994	control	58	CT	A
1995	control	55	C	AT
1996	control	55	CT	A
1997	control	56	C	T
1998	control	59	CT	AT
1999	control	59	C	A
[truncated: 691 more rows]
