# Supplementary material for: Fine-scale mapping of chromosome 9q22.33 identifies candidate causal variant in ovarian cancer
Source: PeerJ. 2024 Feb 14;12:e16918. doi: 10.7717/peerj.16918 (PMC10874173; doi:10.7717/peerj.16918)
Supplement: Supplemental Information 12 [file peerj-12-16918-s012.xlsx]

## Sheet: Variants genotype
ID	rs1413298	rs1889268	rs7027650
1	TC	CC	TT
2	TC	CC	TT
3	TC	CC	TA
4	GG	CC	TT
5	TC	CC	TT
6	TC	CC	TT
7	GG	CC	TT
8	TC	CC	TT
9	TC	CC	TT
10	GG	CC	TT
11	GG	CC	TT
12	TC	CC	TT
13	GG	TC	TA
14	GG	CC	TT
15	GG	CC	TA
16	GG	CC	TT
17	TC	CC	TT
18	TC	CC	TT
19	TC	CC	TT
20	GG	CC	TT
21	TC	CC	TT
22	GG	CC	TT
23	TC	CC	TT
24	GG	CC	TT
25	GG	CC	TA
26	TC	TC	TT
27	NA	NA	TA
28	TC	NA	TA
29	TC	TC	TA
30	TC	CC	TA
31	TC	TC	TA
32	TC	TC	TA
33	GG	TC	TT
34	GG	CC	TA
35	GG	CC	TT
36	TC	CC	TT
37	GG	CC	TA
38	AA	TC	TA
39	GG	CC	TT
40	TC	CC	TA
41	TC	CC	TT
42	TC	CC	TT
43	TC	TC	TT
44	TC	TC	TA
45	TC	TC	TA
46	AA	TC	TT
47	GG	CC	TT
48	TC	TC	TT
49	TC	TC	TT
50	GG	CC	TA
51	GG	CC	TT
52	TC	CC	TT
53	AA	TC	AA
54	TC	TC	TT
55	TC	TC	TA
56	AA	TC	TA
57	GG	TC	AA
58	TC	CC	TT
59	GG	CC	TT
60	GG	TC	TA
61	TC	TC	TA
62	AA	TC	TT
63	TC	TC	TT
64	TC	TC	TT
65	TC	TC	TT
66	TC	TC	TA
67	TC	TC	TT
68	TC	CC	TT
69	GG	CC	TA
70	GG	CC	TA
71	TC	TC	TA
72	TC	TC	TA
73	AA	TT	AA
74	AA	TC	TA
75	AA	TT	TA
76	AA	TT	TA
77	AA	TT	TA
78	TC	TC	TT
79	AA	TC	TA
80	TC	TT	TA
81	AA	TC	NA
82	TC	TC	TA
83	GG	TC	TA
84	AA	TT	AA
85	AA	TC	AA
86	TC	TC	NA
87	TC	TC	TA
88	AA	TC	TT
89	TC	TC	TA
90	GG	TC	TT
91	AA	TT	TT
92	AA	TC	TA
93	AA	TT	TA
94	AA	TC	TA
95	TC	TC	TA
96	AA	NA	TA
97	AA	TT	AA
98	TC	TT	TA
99	GG	TC	TT
100	TC	TC	TA
101	AA	TC	TA
102	TC	CC	TT

## Sheet: Gene expression
ID	COL15A1
1	-0.513226
2	0.649439
3	1.2311
4	0.40647
5	0.0815313
6	0.840671
7	-0.0699949
8	1.11449
9	1.39673
10	1.08284
11	1.9405
12	1.73558
13	1.5831
14	0.0206296
15	1.47651
16	1.6034
17	0.345939
18	-0.345683
19	0.0754748
20	-0.471651
21	1.24079
22	0.957764
23	1.37711
24	1.28227
25	0.71778
26	1.02311
27	2.22995
28	0.00373277
29	1.08693
30	1.616
31	1.2844
32	1.27027
33	0.900534
34	2.04493
35	1.02113
36	0.50661
37	2.15458
38	0.64527
39	-0.017321
40	1.96195
41	1.51463
42	0.687261
43	0.501417
44	0.56279
45	1.55575
46	1.32235
47	0.240165
48	0.461786
49	0.855895
50	1.3099
51	1.8223
52	1.56621
53	1.24751
54	0.519871
55	1.01034
56	0.629002
57	1.94943
58	0.400387
59	0.0759499
60	0.617095
61	0.388563
62	0.350044
63	1.03036
64	1.14347
65	-0.707818
66	0.174759
67	0.868882
68	0.737554
69	-0.765508
70	0.89254
71	0.710861
72	2.11505
73	1.30702
74	1.0862
75	1.93851
76	1.42946
77	2.91071
78	0.275394
79	1.89618
80	0.276456
81	2.20327
82	-0.408565
83	1.03237
84	1.33691
85	1.53623
86	1.07657
87	1.14482
88	0.754699
89	0.215698
90	-0.725461
91	1.38984
92	-0.335508
93	2.32199
94	-0.0182364
95	-0.195881
96	-0.421872
97	1.15007
98	1.77997
99	0.963329
100	0.293825
101	1.05128
102	0.729463

## Sheet: Sample Age
ID	Age
1	75
2	48
3	46
4	49
5	57
6	54
7	51
8	64
9	57
10	61
11	44
12	52
13	44
14	55
15	67
16	50
17	65
18	55
19	38
20	51
21	46
22	52
23	54
24	56
25	64
26	53
27	42
28	60
29	53
30	51
31	86
32	61
33	79
34	44
35	45
36	61
37	75
38	68
39	50
40	70
41	63
42	48
43	84
44	69
45	57
46	46
47	57
48	31
49	59
50	52
51	55
52	82
53	54
54	48
55	57
56	45
57	59
58	42
59	44
60	56
61	53
62	46
63	57
64	50
65	49
66	49
67	28
68	55
69	52
70	52
71	53
72	54
73	52
74	58
75	51
76	55
77	56
78	44
79	50
80	65
81	50
82	55
83	58
84	55
85	60
86	54
87	54
88	50
89	65
90	58
91	48
92	50
93	52
94	73
95	39
96	45
97	64
98	48
99	65
100	56
101	64
102	44
