# Supplementary material for: Fine-scale mapping of chromosome 9q22.33 identifies candidate causal variant in ovarian cancer
Source: PeerJ. 2024 Feb 14;12:e16918. doi: 10.7717/peerj.16918 (PMC10874173; doi:10.7717/peerj.16918)
Supplement: Supplemental Information 13 [file peerj-12-16918-s013.xlsx]

## Sheet: Sheet1
MIQE checklist for authors, reviewers, and editors
Item to check	Importance	Checked by author
Experimental design
Definition of experimental and control groups	E	We described it in ‘Materials and method - Study subject ' on lines 70 to 77.
Number within each group	E
Assay carried out by core lab or investigator's lab?	D
Acknowledgement of authors' contributions	D
Sample
Description	E	We described it in ‘Materials and method - Detection of COL15A1 mRNA expression and eQTL analysis ' on lines 106 to 110.
Volume/mass of sample processed	D
Microdissection or macrodissection	E
Processing procedure	E
If frozen - how and how quickly?	E
If fixed - with what, how quickly?	E
Sample storage conditions and duration (especially for FFPE samples)	E
Nucleic acid extraction
Procedure and/or instrumentation	E	We described it in ‘Materials and method - Detection of COL15A1 mRNA expression and eQTL analysis ' on lines 110 to 116.
Name of kit and details of any modifications	E
Source of additional reagents used	D
Details of DNase or RNase treatment	E
Contamination assessment (DNA or RNA)	E
Nucleic acid quantification	E
Instrument and method	E
Purity (A260/A280)	D
Yield	D
RNA integrity method/instrument	E
RIN/RQI or Cq of 3' and 5' transcripts	E
Electrophoresis traces	D
Inhibition testing (Cq dilutions, spike or other)	E
Reverse transcription
Complete reaction conditions	E	We described it in ‘Materials and method - Detection of COL15A1 mRNA expression and eQTL analysis' on lines 110 to 116.
Amount of RNA and reaction volume	E
Priming oligonucleotide (if using GSP) and concentration	E
Reverse transcriptase and concentration	E
Temperature and time	E
Manufacturer of reagents and catalogue numbers	D
Cqs with and without RT	D*
Storage conditions of cDNA	D
qPCR target information
If multiplex, efficiency and LOD of each assay	E	We described it in ‘Materials and method - Luciferase assay' on lines 122 to 132.
Sequence accession number	E
Location of amplicon	D
Amplicon length	E
In silico specificity screen (BLAST, etc)	E
Pseudogenes, retropseudogenes or other homologs?	D
Sequence alignment	D
Secondary structure analysis of amplicon	D
Location of each primer by exon or intron (if applicable)	E
What splice variants are targeted?	E
qPCR oligonucleotides
Primer sequences	E	We described it in ‘Materials and method - Luciferase assay' on lines 122 to 132 and Figure3(A).
RTPrimerDB identification number	D
Probe sequences	D**
Location and identity of any modifications	E
Manufacturer of oligonucleotides	D
Purification method	D
qPCR protocol
Complete reaction conditions	E	We described it in ‘Materials and method - Luciferase assay' on lines 131 to 132 and Figure3(A).
Reaction volume and amount of cDNA/DNA	E
Primer, (probe), Mg++ and dNTP concentrations	E
Polymerase identity and concentration	E
Buffer/kit identity and manufacturer	E
Exact chemical constitution of the buffer	D
Additives (SYBR Green I, DMSO, etc.)	E
Manufacturer of plates/tubes and catalog number	D
Complete thermocycling parameters	E
Reaction setup (manual/robotic)	D
Manufacturer of qPCR instrument	E
qPCR validation
Evidence of optimisation (from gradients)	D	We described it in ‘Materials and method - Luciferase assay' on lines 122 to 132 .
Specificity (gel, sequence, melt, or digest)	E
For SYBR Green I, Cq of the NCT	E
Standard curves with slope and y-intercept	E
PCR efficiency calculated from slope	E
Confidence interval for PCR efficiency or standard error	D
r2 of standard curve	E
Linear dynamic range	E
Cq variation at lower limit	E
Confidence intervals throughout range	D
Evidence for limit of detection	E
If multiplex, efficiency and LOD of each assay	E
Data analysis
qPCR analysis program (source, version)	E	We described it in‘Materials and method - Statistical analysis' on lines 138 to 143.
Cq method determination	E
Outlier identification and disposition	E
Results of NTCs	E
Justification of number and choice of reference genes	E
Description of normalisation method	E
Number and concordance of biological replicates	D
Number and stage (RT or qPCR) of technical replicates	E
Repeatability (intra-assay variation)	E
Reproducibility (inter-assay variation, %CV)	D
Power analysis	D
Statistical methods for result significance	E
Software (source, version)	E
Cq or raw data submission using RDML	D
